1 Insect immune specificity in a host-parasite model

2

3

4 C.E. Riddell<sup>1</sup>, J.D. Lobaton Garces<sup>1</sup>, S. Adams<sup>2</sup>, D. Twell<sup>1</sup> & E.B. Mallon<sup>1</sup>

5 <sup>1</sup>Department of Biology, University of Leicester, U.K.

6 <sup>2</sup> School of Life Sciences, University of Warwick, U.K.

7

8 Abstract

9 Ecological studies routinely show host-parasite genotype-genotype interactions in insect systems.  
10 The mechanisms behind these interactions are not clearly understood. Using the bumblebee *Bombus*  
11 *terrestris* / trypanosome *Crithidia bombi* model system, we have carried out a transcriptome-wide  
12 analysis of gene expression in bees during *C. bombi* infection. We have performed three analyses,  
13 1) comparing expression in infected and non-infected bees 24 hours after infection by *Crithidia*  
14 *bombi*, 2) comparing expression at 24 and 48 hours after *C.bombi* infection and 3) most importantly  
15 searching for differential gene expression associated with the host-parasite genotype-genotype  
16 interaction at 24 hours after infection. We found a large number of genes differentially regulated  
17 related to numerous canonical immune pathways. These genes include receptors, signaling  
18 pathways and effectors. We discovered a possible interaction between the peritrophic membrane  
19 and the insect immune system in defense against *Crithidia*. Most interestingly we found differential  
20 expression of *Dscam* related transcripts depends on the genotype-genotype interactions of the given  
21 bumblebee colony and *Crithidia* strain.

22

23 Invertebrate ecological studies have found infection outcomes within a given host-parasite system  
24 are variable. Part of this variance is determined by the interaction of the genotype of the host and  
25 the genotype of the parasite (Schmid-Hempel 2001; Carius *et al.* 2001; Lambrechts 2010). That is  
26 this interaction between host and parasite is specific (Schmid-Hempel 2005). How is this level of  
27 specificity generated? An obvious answer would be an interaction between the parasite and the  
28 host's immune response. We cannot take this for granted. Various ecological measures of disease  
29 outcome have been used to quantify genotype-genotype interactions. These measures include host  
30 mortality, fecundity and infection rate. Such measures cannot test directly if it is the immune  
31 response that produces this level of specificity (Hauton & Smith 2007). It may be other non-  
32 immune processes could explain such outcomes.

33

34 The bumblebee, *Bombus terrestris*/trypanosome *Crithidia bombi* system displays host x parasite  
35 genotype-genotype interactions (Schmid-Hempel *et al.* 1999; Schmid-Hempel & Reber-Funk  
36 2004). There is evidence that the immune system has a role in generating this host-parasite specific  
37 response. A number of studies have found differential immune gene expression in response to  
38 *Crithidia* (Schlüns *et al.* 2010; Riddell *et al.* 2011; Brunner *et al.* 2013; Barribeau & Schmid-  
39 Hempel 2013). We found increased *Crithidia* loads in bees whose expression of antimicrobial  
40 peptides was knocked down by RNAi (Deshwal & Mallon 2014). We have even shown that bees  
41 from different host genotypes induce differential expression of antimicrobial peptides (AMPs),  
42 according to the strain of *C. bombi* they had been infected with (Riddell *et al.* 2009), that is we  
43 found specificity in the immune response itself. A recent paper using RNA-Seq found numerous  
44 genes are differentially expressed in a genotype-genotype fashion (Barribeau *et al.* 2014).

45

46 Here, we carry out a transcriptome-wide analysis of gene expression in bees during *C.bombi*  
47 infection. We have carried out three analyses, comparing 1) expression in infected and non-infected  
48 bees 24 hours after infection by *Crithidia bombi* (Infected versus uninfected) 2) expression at 24

49 and 48 hours after *C.bombi* infection (24 versus 48 hour) and 3) searching for differential gene  
50 expression associated with the host-parasite genotype-genotype interaction at 24 hours post  
51 infection (Specificity). Enrichment analysis was also carried out on expression data to see which  
52 categories of molecules are differentially regulated during infection. The results confirm our  
53 previous findings of up-regulation in antimicrobial peptide expression and provide a comprehensive  
54 overview of changes in and the specificity of gene expression after exposure to 2 strains of  
55 *C.bombi*.

56

## 57 **Methods**

58 The samples used during this experiment are as previously described (Riddell *et al.* 2009). We have  
59 chosen samples that displayed a reciprocal pattern of expression for the three antimicrobial peptides  
60 (AMPs) tested in that paper. These were colony K5 (called K from now on) and Q1 (Q) and strains  
61 6 and 8. K-8 showed a high AMP expression, Q-8 a low expression level, Q-6 a high level and K-6  
62 a low level of AMP expression.

## 63 ***Sample Collection***

64 Experiments were carried out on one commercially reared bumblebee colony from Koppert  
65 Biological Systems U.K. (Colony K) and one colony from wild caught queens (Colony Q). Faecal  
66 samples from these colonies were checked under a light microscope to ensure there was no  
67 *Crithidia bombi* present (Mallon *et al.* 2003). All parasite isolates used originated from wild queens  
68 collected in Spring 2008 in the botanical gardens, University of Leicester. Experiments began when  
69 the colonies had a minimum of thirty workers, approximately four weeks old. Between  
70 observations, colonies were fed *ad libitum* with pollen (Percie du sert, France) and 50% diluted  
71 glucose/fructose mix (Meliose – Roquette, France). Before and during the experiments colonies  
72 were kept at 26°C and 60% humidity in constant red light.

## 73 ***Infections***

74 To prepare *C. bombi* isolates, faeces was collected from workers of naturally infected colonies, and  
75 mixed with 50% diluted Meliose to create a standardized dose of 500 *Crithidia* cells per µl of  
76 inoculum. Previous studies had shown that such inocula, prepared from different colonies, are  
77 genotypically different (Schmid-Hempel & Reber-Funk 2004) and generate specific responses in  
78 novel hosts (Schmid-Hempel *et al.* 1999). However we can not rule out the possibility that we may  
79 be confounding our results with the addition of hidden infections or gut microbiota from the donor  
80 colonies. We infected a sample of workers from each of K and Q bumblebee colonies (representing  
81 different host lines) with an inoculum of faeces from each of the two wild infected colonies (6 and 8

82 *Crithidia* strain). We also collected uninfected controls. Bees were four days old at the time of  
83 infection. Bees were collected over several days and distributed across treatment groups (Moret &  
84 Schmid-Hempel 2009). After infection bees were kept in colony x strain groups (1–3 individuals  
85 depending on day collected) and fed *ad libitum*. Twenty four hours or 48 hours post infection the  
86 bees were sacrificed by freezing in liquid nitrogen and stored at  $-80^{\circ}\text{C}$ .

### 87 ***RNA sample preparation and sequencing***

88 Total RNA was extracted from 23 individual homogenised abdomens using Tri-reagent (Sigma-  
89 Aldrich, UK). Samples (Colony-Strain-Timepoint (number of replicates)) were K-6-24 (3), K-6-48  
90 (3), K-8-24 (3), K-8-48 (3), K-Uninfected (2), Q-6-24 (3), Q-6-48 (3), Q-8-24 (2), Q-uninfected (1).  
91 Any residual contaminants were removed from the RNA using the RNeasy mini kit (Qiagen, UK)  
92 and manufacturer's RNA clean-up protocol. To remove residual genomic DNA, RNA samples were  
93 treated with DNase (Sigma-Aldrich, UK). TruSeq RNA-seq libraries were made from the 23  
94 samples at NBAF Edinburgh. Sequencing was performed on an Illumina HiSeq®2000 instrument  
95 (Illumina, Inc.) by the manufacturer's protocol. Multiplexed 50 base single-read runs were carried  
96 out yielding an average of 12M reads per sample.

97

### 98 ***Statistical analysis***

99 The reference transcriptome was downloaded from  
100 [http://www.nematodes.org/downloads/databases/Bombus\\_terrestris/](http://www.nematodes.org/downloads/databases/Bombus_terrestris/) (Colgan *et al.* 2011).  
101 Functional annotation related to the transcriptome was obtained using the BLAST2GO package  
102 (Götz *et al.* 2008). Alignment was done using GSNAP (version 2012-07-20) (Wu & Nacu 2010).  
103 Only reads that mapped uniquely were selected for further analysis. Counts were generated per  
104 transcript for each sample.

105

106 Differential expression analysis was performed using the edgeR (3.4.0) package (McCarthy *et al.*

107 2012) in R (3.0.1) (R Core Team 2013). Normalization factors were computed using the TMM  
108 technique, after which tagwise dispersions were calculated and subjected to a generalized linear  
109 model (GLM). Resulting  $p$  values were subjected to Benjamini–Hochberg multiple testing  
110 correction to derive FDRs; only transcripts with a FDR < 0.05 were considered for further analysis.  
111 Three separate GLMs were carried out, one looked for transcripts that are differentially expressed  
112 upon infection with *Crithidia* at 24 hours post-infection (Infected versus uninfected)  
113 (~0+colony+infect(yes/no)) infect here are bees either infected with strain 6 or 8, one looking at the  
114 gene expression difference between 24 hours and 48 hours post strain 6 infection (24 versus 48  
115 hours)(~0+colony + time) and a further GLM that looked for transcripts that were expressed in a  
116 specific pattern at 24 hours post-infection (specificity)(~0+colony\*strain).

117

118 Using Blast2Go, we then carried out an enrichment analysis (Fisher exact test) on each of these lists  
119 of differentially expressed genes to see which GO terms are overrepresented relative to the entire  
120 genome. We then used REVIGO to summarize and visualise these terms (Supek *et al.* 2011).

121

122 For each of the lists of differentially expressed transcripts we also carried out a blastx analysis  
123 against the insect innate immunity database (IIID) (Brucker *et al.* 2012). We used the BLOSUM62  
124 matrix with a word size of 3. The results were filtered to only contain hits with an  $E$ -value <1e-10  
125 and a bit score  $\geq 30$ .

126

## 127 **Results**

### 128 ***Genes differentially expressed at 24 hours post-infection (Infected versus uninfected)***

129 31,843 unique transcripts were mapped to the transcriptome. 489 transcripts were found to be  
130 differentially expressed 24 hours post-infection (FDR < 0.05), including 324 downregulated and  
131 165 upregulated transcripts (See supplementary data for complete list). Reannotating the transcripts  
132 using Blast2GO (blastx against the nr database with  $e < 0.001$ ), 109 had no BLAST hits. A further  
133 68 had uninformative BLAST hits (anonymous predicted protein). The remaining 312 were used in  
134 the enrichment analysis. Figure 1 shows a summary of the enriched GO terms found (Fisher's test  $p$   
135 < 0.05). Defense response (GO:0006952, FDR = 0.047) and chitin metabolism (GO:0006030, FDR  
136 = 0.032) were the only processes significantly enriched at a more stringent level (FDR < 0.05).

137

#### 138 *Peritrophic membrane:*

139 The peritrophic matrix (PM) forms a layer composed of chitin and glycoproteins that lines the  
140 insect midgut lumen (Kuraishi *et al.* 2011). The PM facilitates digestion and forms a protective  
141 barrier to prevent the invasion of ingested pathogens (Lehane 1997; Kuraishi *et al.* 2011). Fibrillin 1  
142 (BTT14121\_1), a venom protein precursor (BTT32193\_1), Neurotrypsin (BTT07956\_1),  
143 Peritrophin-1-like (BTT01709\_1, BTT22959\_1, BTT37215\_1, BTT42262\_1) and four chitinase  
144 transcripts (Chitinase 3: BTT23997\_1 BTT38724\_1, Chitinase 4 BTT20684\_1, BTT23469\_1) are  
145 downregulated upon infection. Fibrillins are extracellular matrix macromolecules, ubiquitous in the  
146 connective tissues (Isogai *et al.* 2003). BTT32193\_1 was classed as a venom protein, but was also  
147 very similar to Chitinase 3 (blastx  $e = 1e^{-16}$ ). Chitinases modulate the structure and porosity of the  
148 PM (Dinglasan *et al.* 2009). Neurotrypsin is a serine protease expressed in the nervous system  
149 (Gschwend *et al.* 1997). However in the protease domain it shares similarities with Sp22D, a chitin  
150 binding serine protease (Danielli *et al.* 2000). The chitin fibrils of the PM are assembled into a wide  
151 cross-hatched pattern connected by peritrophins (Dinglasan *et al.* 2009). A second group made up  
152 of Peritrophin-1 (BTT05886\_1, BTT20661\_1) and 3 further chitinase transcripts (Chitinase 2



153 :BTT23246\_1, Chitinase 3: BTT39163\_1, Chitinase 4: BTT05313\_1) is upregulated. Figure 2  
154 shows the correlation of expression patterns between these sixteen transcripts related to chitin  
155 metabolism. There is some clustering, but not of any clear functional groups. Taken together this  
156 differential expression suggests an important role for the repair or restructuring of the peritrophic  
157 matrix in the bumblebees' response to *Crithidia*.

158

159 When the BLAST searches against the IID and nr databases were combined, we found that 89  
160 transcripts relate to canonical insect immune genes. We describe them in the order receptors, serine  
161 proteases, signalling pathways and effectors (Schmid-Hempel 2005).

162

163 *Receptors:*

164 The Down syndrome cell adhesion molecule (Dscam), a pattern recognition receptor has come to  
165 the forefront of research into insect immune specificity as thousands of different splice forms have  
166 been identified and it is associated with insect immunity (Smith *et al.* 2011). We found five  
167 downregulated transcripts annotated as immunoglobulin superfamily (*Dscam* included in hit list)  
168 (BTT03519\_1, BTT08682\_1, BTT15814\_1, BTT26724\_1, BTT27678\_1) and one upregulated  
169 transcript (BTT03519\_1).

170

171 *Serine proteases:*

172 Serine proteases are important proteolytic enzymes in many molecular pathways. When these serine  
173 proteases are no longer needed, they are inactivated by serine protease inhibitors (Zhao *et al.* 2012).  
174 CLIP domain serine proteases mediate insect innate immunity (Zou *et al.* 2006). Twenty one  
175 transcripts related to serine proteases, serine protease homologues or serine protease inhibitors were  
176 differentially expressed upon infection (see Table 1). Lipophorin receptor 2 (downregulated  
177 BTT34617\_1) binds with serpins to aid in their encytocytosis (Soukup *et al.* 2009).

178

179 *Signalling pathways:*

180 We found a transcript for *Spatzle* (BTT19738\_1) downregulated at this time point. Activation of the  
181 Toll immune pathway requires the activation of *Spatzle* (Lemaitre & Hoffmann 2007). MyD88  
182 (upregulated BTT15687\_1) is a death domain-containing adaptor activated by Toll leading to the  
183 activation of *Pelle*. *Dorsal* (BTT25273\_1) was also downregulated. The nuclear translocation of  
184 *Dorsal*, a member of the NF- $\kappa$ B family, in the Toll pathway induces the expression of many  
185 immune genes. We found an upregulated transcript (BTT09662\_1) for *Helicase89B* part of the Toll  
186 and Imd Pathway. It is required downstream of NF- $\kappa$ B for the activation of AMP genes in  
187 *Drosophila melanogaster* (Yagi & Ip 2005). *ird5* codes for a catalytic subunit of an IkappaB kinase  
188 that cleaves Relish. Relish (Imd pathway) is an essential regulator of antimicrobial peptide gene  
189 induction. We found *ird5* (BTT03904\_1) to be downregulated 24 hours post-infection.

190

191 In mammals semaphorins are crucially involved in various aspects of the immune response  
192 (Takamatsu & Kumanogoh 2012). A semaphorin-5A-like transcript (BTT01850\_1) was  
193 downregulated 24 hours post-infection. Semaphorin regulates the activity of Ras-family small  
194 GTPases (Takamatsu & Kumanogoh 2012). A Ras-like protein11B transcript (BTT05368\_1) was  
195 also downregulated. The Ras/MAPK pathway was found to be essential for the suppression of the  
196 Imd immune pathway in *Drosophila* (Ragab *et al.* 2011).

197

198 The downregulated Drumstick (BTT13062\_1) interacts with the JAK/STAT pathway during its'  
199 development role (Johansen *et al.* 2003), but we could not find any information about its immune  
200 role. Two transcripts (BTT11590\_1, BTT14205\_1) of *Puckered* were downregulated. *Puckered*,  
201 which codes for a dual specificity phosphatase, is a key regulator of the c-Jun-N-terminal kinase  
202 (JNK) immune pathway (Karkali & Panayotou 2012). Mpk2/p38a (downregulated BTT05769\_1) is  
203 involved in the JNK Pathway and JAK/STAT Pathway. Heat-shock factor activation by p38 is a  
204 recently discovered part of antimicrobial reactions in flies (Chen *et al.* 2010). We found two heat

205 shock protein transcripts (BTT23758\_2, BTT37030\_1) and one other (BTT17701\_1) that were  
206 downregulated and upregulated respectively. These are all involved in the JAK/STAT pathway.

207

208 *Effectors:*

209 In our previous paper (Riddell *et al.* 2011) we found that antimicrobial peptides were upregulated at  
210 24 hours post-infection. We would expect the same trend here. Indeed, we found that five  
211 transcripts for defensin (BTT06274\_2, BTT8490\_1, BTT10405\_1, BTT14019\_1, and  
212 BTT42034\_1) and three hymenoptaecin transcripts (BTT18071\_1, BTT24170\_1, BTT24170\_2)  
213 were all upregulated. An apidaecin precursor (BTT33652\_1) was downregulated. Apidaecin has  
214 recently been shown to be expressed in bumblebees (Colgan *et al.* 2011). The downregulated beta-  
215 amyloid-like protein (BTT20240\_1) has been shown to be an antimicrobial peptide in mammals  
216 (Soscia *et al.* 2010). Hemolectin (BTT15326\_1, upregulated) is a clotting protein known to have a  
217 role against gram-negative bacteria (Lesch *et al.* 2007).

218

219 Reactive oxygen species (ROS) are generated by respiration in the mitochondria or as part of the  
220 immune response (Molina-Cruz *et al.* 2008). P450 cytochromes are oxidases acting terminally in  
221 monooxygenase systems (Felix & Silveira 2012). Some are regulated in response to infection  
222 possibly either as direct immune responders (Vlachou *et al.* 2005), producing nitric oxide (NO) or  
223 other reactive oxygen radicals or as part of the host detoxification process decreasing oxidative  
224 stress after an infection (Molina-Cruz *et al.* 2008). A number of *cytochromes P450* were  
225 differentially expressed 24 hours post infection. Ten cytochrome p450 transcripts (*Cyp4p3*:  
226 BTT05294\_1, BTT20848\_1, BTT22253\_1, BTT23317\_1, BTT32674\_1, *cytochrome P450 4g15*:  
227 BTT23811\_1, BTT32459\_1, *cytochrome P450 6k1*: BTT35547\_1, BTT40653\_1, *cytochrome P450*  
228 *6a14*: BTT38445\_1) were found to be downregulated. Three other *cytochrome P450* transcripts  
229 (*Cyp4p3*: BTT21216\_1, BTT35543\_1, *cytochrome P450 315a1*: BTT26726\_1) were upregulated.  
230 Several other cytochromes (cytochrome b: BTT20524\_1, BTT39776\_1, BTT41896\_1, and

231 cytochrome c: BTT05255\_2) were downregulated.

232

233 Numerous other actors in the production of ROS were found to be differentially expressed. *TPX4*  
234 (BTT13285\_1), coding for a Thioredoxin-dependent peroxidase, which detoxifies H<sub>2</sub>O<sub>2</sub> was  
235 downregulated. This gene was found to be differentially expressed during *Plasmodium* infection in  
236 *Anopheles gambiae* (Baton *et al.* 2009). Calcineurin (BTT08150\_1, BTT26273\_1) was found to be  
237 downregulated 24 hours post-infection, which agrees with our previous findings (Riddell *et al.*  
238 2011). In infected *D. melanogaster* larvae, NO signals are enhanced by Calcineurin to promote  
239 induction of robust immune responses via the Imd signalling pathway (Dijkers & O'Farrell 2007).

240

241 We found downregulation of sortilin-related receptor-like (BTT31654\_1). In mammals, sortilin aids  
242 in phagocytosis (Wähe *et al.* 2010). Two downregulated transcripts (BTT35021\_1, BTT08756\_1)  
243 were matched to *croquemort*, which codes for a key scavenger receptor in the Imd pathway (Franc  
244 *et al.* 1999). Annexin IX (downregulated BTT02025\_1) has been shown to be induced by septic  
245 injury in *Drosophila* and is thought to encode for an anticoagulant (Gregorio *et al.* 2001).

246

247 *Miscellaneous:*

248 Major royal jelly protein (BTT05317\_2, BTT36365\_1 upregulated) has been shown to have  
249 antimicrobial properties and to be expressed in response to bacterial infection in honeybees  
250 (Scharlaken *et al.* 2007; Buttstedt *et al.* 2013). Vitellogenin (downregulated BTT36006\_1) is a  
251 potent regulator of the immune response in honeybees (Amdam *et al.* 2004). Several orthologs of  
252 putative *Drosophila* immune loci were differentially expressed 24 hours post-infection (CG12505:  
253 BTT00934\_1, CG18348: BTT04397\_1, CG7296: BTT15035\_1, BTT18395\_1, CG8791:  
254 BTT18908\_1, CG5527: BTT35653\_1, Fst: BTT11511\_1). The downregulated CG4393  
255 (BTT05817\_1) is weakly analogous to TNF receptor associated factor 3 (TRAF3) that mediates  
256 signal transduction involved in mammalian immune responses. Downregulated BTT37289\_1 codes

257 for a putative fatty acyl-CoA reductase.

258

259 ***Genes differentially expressed between 24 hours post-infection and 48 hours post-infection (24***  
260 ***versus 48 hours)***

261 43 transcripts were differentially expressed between 24 hours post-infection and 48 hours post-  
262 infection. Of these 17 had no BLAST hits. A further six had uninformative BLAST hits  
263 (anonymous predicted protein). The remaining 20 were used in the analysis. Defence response was  
264 the only GO term significantly enriched (FDR= 0.00015), with seven transcripts. Three transcripts  
265 correspond to Hymenoptaecin (BTT18071\_1, BTT24170\_1, BTT24170\_2). They were all  
266 upregulated. This suggests a continuing strong AMP production 48 hours after infection. This  
267 agrees with other immune assays in bumblebees (Korner & Schmid-Hempel 2004). Argonaute-2, a  
268 RNA-silencing endonuclease, is involved in antiviral defence in insects (downregulated  
269 BTT02484\_1) (van Rij *et al.* 2006). GstD8, a glutathione S-transferase, is involved in the  
270 detoxification process (upregulated BTT04810\_1) (Gerardo *et al.* 2010). Dopa decarboxylase  
271 (upregulated BTT28048\_1) converts L-dopa to dopamine during the melanisation process (Ferdig *et*  
272 *al.* 2000). SCR-B9 (upregulated BTT40924\_1) codes for a scavenger receptor protein. Scavenger  
273 receptor proteins have been found to be microbial pattern recognition receptors in flies (Rämet *et al.*  
274 2001).

275

276 **Genes differentially expressed depending on host genotype – parasite genotype interactions**  
277 **(Specificity)**

278 There were 591 differentially expressed transcripts (FDR < 0.05). Reannotating the transcripts  
279 using Blast2GO (blastx against the nr database with e < 0.001), 150 had no BLAST hits. A further  
280 64 had uninformative BLAST hits (anonymous predicted protein). There were 109 transcripts that  
281 had previously been found to be differentially expressed at 24 hours post infection. A

282 multidimensional scaling (MDS) plot of the samples based on the expression of these 591 genes.  
283 reveals that the 11 samples group into their colony-strain interaction (Figure 3).

284

285 Of the 591 transcripts, 132 were upregulated and 459 were downregulated. Up or downregulation  
286 does not have the same meaning here as in the infected versus uninfected model where there was a  
287 clear baseline (uninfected). Depending on how the GLM is ordered, the reciprocal result could be  
288 observed. Our model used colony K strain 8 as the final contrast. From our previously published  
289 qPCR data (Riddell *et al.* 2009), we know the colony K strain 8 interaction displayed the highest  
290 levels of AMPs (effectors). Therefore when we say a transcript is upregulated, we mean it is  
291 upregulated in this high immune response interaction.

292

293 As with the infection data, we combined the BLAST searches against the IIID and nr databases.  
294 Ninety transcripts correspond to canonical insect immune genes. We again describe them in the  
295 order receptors, serine proteases, signalling pathways and effectors (Schmid-Hempel 2005).

296

297 *Receptors:*

298 Two transcripts were associated with gram-negative binding proteins (upregulated GGBP,  
299 BTT03533\_1 and downregulated *GNBPI-2* BTT35513\_1). Although GNBP are most associated  
300 with defense against gram-negative bacteria, they have been shown to have a role in response to  
301 *Plasmodium* infections (Tahar *et al.* 2002). C-type lectins (CTLs) bind carbohydrates and mediate  
302 processes including pathogen recognition (Cirimotich *et al.* 2010). CTL4 is an agonist to *Plasmodium*  
303 infections in mosquitoes (Cirimotich *et al.* 2010). A CTL4 transcript (BTT29328\_1) was found to  
304 be downregulated.

305

306 One downregulated transcript was related to *Dscam* (BTT12755\_1). A further fourteen  
307 downregulated transcripts were part of the Ig superfamily (IGFn3-1: BTT05561\_1, BTT05581\_1,

308 BTT08682\_1, BTT12655\_1, BTT13442\_1, BTT14516\_1, BTT18750\_1, BTT21156\_1,  
309 BTT22598\_1, BTT22819\_1, BTT23339\_1, BTT24070\_1, IGFn3-7: BTT08109\_1, BTT09498\_1)  
310 and one was upregulated (IGFn3-8: BTT03519\_1). *Dscam* and most of the other Ig superfamily  
311 transcripts cluster together in the top right of figure 4, suggesting they are similarly expressed.

312

313 *Serine proteases:*

314 28 transcripts related to serine proteases, serine protease homologues or serine protease inhibitors  
315 were differentially expressed (see Table 2).

316

317 *Signalling pathways:*

318 The Toll-like receptor *18Wheeler* (BTT35732\_1) and *Toll 10* (BTT09386\_1) were both  
319 upregulated. *18Wheeler* has been shown to be important in the anti gram-negative immune response  
320 in *Drosophila* larvae (Ligoxygakis *et al.* 2002). *Dorsal 1A* (BTT04010\_1), a transcription factor  
321 that is an important part of the Toll pathway, was downregulated. A transcript for *Spatzle 1-2* was  
322 also downregulated (BTT10679\_1).

323

324 The tyrosine kinase *Pvr* (BTT04822\_1), which inhibits JNK activation (Bond & Foley 2009) was  
325 downregulated. *Jun*, a transcription factor of the JNK pathway was downregulated (BTT13636\_1).  
326 *Mpk2/p38a* (downregulated BTT16580\_1) and *MAPKKK9* (downregulated BTT04404\_1) are  
327 mitogen-activated protein kinases involved in the JNK Pathway and JAK/STAT pathways. We  
328 found two heat shock protein transcripts (BTT17371\_1, BTT22195\_1) and one other  
329 (BTT17701\_1) that were downregulated and upregulated respectively. These are all involved in the  
330 JAK/STAT pathway. *Akt 1* (downregulated BTT14188\_1) is part of the insulin/insulin-like growth  
331 factor 1 signaling (IIS) cascade. IIS plays a critical role in the regulation of innate immunity.  
332 Activation of *Akt* signaling leads to a decrease in malaria infection intensity in mosquitoes (Corby-  
333 Harris *et al.* 2010).

334

335 *Effectors:*

336 Five transcripts relate to the AMPs *defensin* (BTT06274\_2, BTT42034\_1) and hymenoptaecin  
337 (BTT18071\_1, BTT24170\_1, BTT24170\_2). They were all upregulated. An apidaecin precursor  
338 (BTT20828\_1) was upregulated. Hemolectin had three downregulated transcripts (BTT14194\_1,  
339 BTT17013\_1, BTT26614\_1) and one upregulated (BTT15326\_1). Argonaute-2, a RNA-silencing  
340 endonuclease, is involved in antiviral defense in insects (downregulated BTT02374\_1) (van Rij *et*  
341 *al.* 2006).

342

343 *Eater* encodes a transmembrane receptor involved in phagocytosis in *Drosophila* (Kocks *et al.*  
344 2005). A transcript (BTT11132\_1) relating to *Eater* was upregulated. The melanisation process  
345 component Dopa decarboxylase (BTT19093\_1) was upregulated. Another enzyme involved in  
346 melanisation, laccase was found to be downregulated (BTT20241\_1, BTT33633\_1) (Arakane *et al.*  
347 2005).

348

349 *Cyp4p3* transcript BTT40653\_1 was upregulated. Two previously unseen *Cyp4p3* transcripts  
350 (BTT05254\_1, BTT20622\_2) were upregulated and one (BTT36257\_1) downregulated. *TPX4*  
351 (BTT13285\_1) that codes for a Thioredoxin-dependent peroxidase was downregulated.

352

353 *Miscellaneous:*

354 A small number of transcripts were related to chitin metabolism. SCRASP1 has a chitin-binding  
355 domain that has been hypothesized to sense chitin in response to injury and to transduce signals via  
356 the serine protease domain (Blumberg *et al.* 2013). We found an upregulated transcript related to  
357 *SCRASP 1* (BTT41923\_1). A peritrophin precursor was also upregulated (BTT10727\_1). As was a  
358 chitinase 3 transcript (BTT23246\_1).

359



360 *Retinoid and fatty-acid-binding protein (RfaBp)* (BTT07678\_1) was downregulated. RfaBp was  
361 found to be upregulated upon injection of LPS in *Drosophila* during a proteomic study (Vierstraete  
362 *et al.* 2004). *Notch* (upregulated BTT09545\_1) is involved in the specification of crystal cells in  
363 *Drosophila melanogaster* (Mukherjee *et al.* 2011). Finally, several orthologs of putative *Drosophila*  
364 immune loci were found to be differentially expressed (CG5527: BTT08512\_1, CG12505:  
365 BTT00934\_1, CG13323: BTT38025\_1, BTT38087\_1, CG17560: BTT02877\_1 downregulated,  
366 BTT05845\_1 upregulated, CG18348: BTT20843\_1).

367 **Discussion**

368 We present a comprehensive transcriptomic analysis of gene expression in this important model  
369 host-parasite system. We have identified a large number of bumblebee genes whose expression are  
370 changed upon infection with *Crithidia*. We also found a large number of genes whose expression  
371 depends on the interaction between host and parasite genotypes and therefore show specificity.

372

373 We confirmed the importance of antimicrobial peptides in the specific defence against *Crithidia*  
374 (Riddell *et al.* 2009, 2011; Deshwal & Mallon 2014). It is also clear that several other effectors  
375 including ROS and phagocytosis may be important. Several immune pathways seem to be  
376 important in the anti-*Crithidia* response. These include the Toll, Imd and JAK/STAT pathways.  
377 Toll especially seems to be important in a specific immune response.

378

379 There are a larger proportion of receptor transcripts found in the specificity analysis (3.2% 19/591)  
380 compared to the infection analysis (1.2% 6/489). This is not surprising, as it may be expected that a  
381 specific immune response to a given strain would be based mainly on how it is recognised.  
382 Although several receptors, including GNBPs and lectins, are differentially expressed, the most  
383 exciting discovery is the large number of transcripts related to *Dscam*. The Down syndrome cell  
384 adhesion molecule (*Dscam*), a pattern recognition receptor has come to the forefront of research  
385 into insect immune specificity as thousands of different splice forms are generated and it is  
386 associated with insect immunity (Smith *et al.* 2011). In the fruit fly *Drosophila*, silencing of *Dscam*  
387 retards the insect's capacity to engulf bacteria by phagocytosis (Watson *et al.* 2005). In *Anopheles*,  
388 the *Dscam* splice forms produced in response to parasite exposure differs between bacteria and  
389 *Plasmodium* and between *Plasmodium berghei* and *Plasmodium falciparum* (Dong *et al.* 2006).  
390 This has been tempered by the finding that *Dscam* diversity does not increase with exposure to  
391 increasing heterogeneity of *Plasmodium falciparum* genotypes (Smith *et al.* 2011). Recently it has  
392 been shown that *Dscam* specificity is mediated by the transcriptional regulation of specific splicing

393 factors downstream of the activation of the Toll and IMD pathways (Dong *et al.* 2012). Our results  
394 suggest that *Dscam* related genes may be important in differentiating strains of the trypanosome  
395 *Crithidia bombi*.

396

397 We found a number of genes associated with chitin metabolism. Through several pathways chitin  
398 metabolism is fundamental to invertebrate immunity (Beckerman *et al.* 2013). As an aside, an  
399 intriguing hypothesis is that chitin metabolism is the nexus through which defense against predators  
400 and against parasites are traded-off (Beckerman *et al.* 2013). Our data suggests that the peritrophic  
401 matrix may be fundamental in the bee's defence against *Crithidia*. The peritrophic matrix acts as an  
402 immunological barrier against trypanosomes. Tsetse flies with an underdeveloped PM have lower  
403 levels of refractoriness to trypanosome infections (Weiss *et al.* 2013). This is due to a premature  
404 immune response; the trypanosomes get through the PM quicker and stimulate the immune  
405 response at an earlier stage compared to refractory flies.

406

407 A similar study has recently been published (Barribeau *et al.* 2014). Although they find genotype x  
408 genotype interactions in gene expression, it is in a much smaller number of genes. We hypothesise  
409 that our much larger catalogue of genes, including *Dscam*, is due to our experimental design. We  
410 used a 2x2 analysis of preselected reciprocal host-parasite interactions. This increased our  
411 likelihood of detecting differential expression using RNA-seq compared to a less directed sample  
412 collection.

413

414 In this paper we have shown that the expression of immune genes is associated with specific  
415 interactions between different host and parasite genotypes in this bumblebee / trypanosome model. In  
416 future RNAi work we will knockdown candidate genes thereby altering these specific interactions  
417 to directly examine their biological significance.

418 Acknowledgements

419 Thanks to S. Barribeau & P. Schmid-Hempel for discussions. CR was funded by a BBSRC  
420 studentship. This work was partially funded through a NERC NBAF pilot grant (NBAF606) to  
421 EBM.

422

423

424

425 **References**

- 426 Amdam GV, Simões ZLP, Hagen A *et al.* (2004) Hormonal control of the yolk precursor  
427 vitellogenin regulates immune function and longevity in honeybees. *Experimental Gerontology*, **39**,  
428 767–773.
- 429 Arakane Y, Muthukrishnan S, Beeman RW, Kanost MR, Kramer KJ (2005) Laccase 2 is the  
430 phenoloxidase gene required for beetle cuticle tanning. *Proceedings of the National Academy of*  
431 *Sciences of the United States of America*, **102**, 11337–11342.
- 432 Barribeau SM, Sadd BM, Plessis L du, Schmid-Hempel P (2014) Gene expression differences  
433 underlying genotype-by-genotype specificity in a host–parasite system. *Proceedings of the National*  
434 *Academy of Sciences*, 201318628.
- 435 Barribeau SM, Schmid-Hempel P (2013) Qualitatively different immune response of the bumblebee  
436 host, *Bombus terrestris*, to infection by different genotypes of the trypanosome gut parasite,  
437 *Crithidia bombi*. *Infection, Genetics and Evolution*, **20**, 249–256.
- 438 Baton LA, Robertson A, Warr E, Strand MR, Dimopoulos G (2009) Genome-wide transcriptomic  
439 profiling of *Anopheles gambiae* hemocytes reveals pathogen-specific signatures upon bacterial  
440 challenge and *Plasmodium berghei* infection. *BMC Genomics*, **10**, 257.
- 441 Beckerman AP, de Roij J, Dennis SR, Little TJ (2013) A shared mechanism of defense against  
442 predators and parasites: chitin regulation and its implications for life-history theory. *Ecology and*  
443 *Evolution*, **3**, 5119–5126.
- 444 Blumberg BJ, Trop S, Das S, Dimopoulos G (2013) Bacteria- and IMD Pathway-Independent  
445 Immune Defenses against *Plasmodium falciparum* in *Anopheles gambiae*. *PLoS ONE*, **8**.
- 446 Bond D, Foley E (2009) A quantitative RNAi screen for JNK modifiers identifies Pvr as a novel  
447 regulator of *Drosophila* immune signaling. *PLoS pathogens*, **5**, e1000655.
- 448 Brucker RM, Funkhouser LJ, Setia S, Pauly R, Bordenstein SR (2012) Insect Innate Immunity  
449 Database (IID): An Annotation Tool for Identifying Immune Genes in Insect Genomes. *PLoS*  
450 *ONE*, **7**, e45125.

- 451 Brunner FS, Schmid-Hempel P, Barribeau SM (2013) Immune Gene Expression in *Bombus*  
452 *terrestris*: Signatures of Infection Despite Strong Variation among Populations, Colonies, and Sister  
453 Workers. *PLoS ONE*, **8**, e68181.
- 454 Buttstedt A, Moritz RFA, Eler S (2013) Origin and function of the major royal jelly proteins of the  
455 honeybee (*Apis mellifera*) as members of the yellow gene family. *Biological Reviews*, 255–269.
- 456 Carius HJ, Little TJ, Ebert D (2001) Genetic variation in a host-parasite association: Potential for  
457 coevolution and frequency-dependent selection. *Evolution*, **55**, 1136–1145.
- 458 Chen J, Xie C, Tian L *et al.* (2010) Participation of the p38 pathway in *Drosophila* host defense  
459 against pathogenic bacteria and fungi. *Proceedings of the National Academy of Sciences*, **107**,  
460 20774–20779.
- 461 Cirimotich CM, Dong Y, Garver LS, Sim S, Dimopoulos G (2010) Mosquito immune defenses  
462 against *Plasmodium* infection. *Developmental & Comparative Immunology*, **34**, 387–395.
- 463 Colgan TJ, Carolan JC, Bridgett SJ *et al.* (2011) Polyphenism in social insects: insights from a  
464 transcriptome-wide analysis of gene expression in the life stages of the key pollinator, *Bombus*  
465 *terrestris*. *BMC Genomics*, **12**, 623.
- 466 Corby-Harris V, Drexler A, Watkins de Jong L *et al.* (2010) Activation of Akt Signaling Reduces  
467 the Prevalence and Intensity of Malaria Parasite Infection and Lifespan in *Anopheles stephensi*  
468 Mosquitoes. *PLoS Pathog*, **6**, e1001003.
- 469 Danielli A, Loukeris TG, Lagueux M *et al.* (2000) A modular chitin-binding protease associated  
470 with hemocytes and hemolymph in the mosquito *Anopheles gambiae*. *Proceedings of the National*  
471 *Academy of Sciences*, **97**, 7136–7141.
- 472 Deshwal S, Mallon EB (2014) Antimicrobial peptides play a functional role in bumblebee anti-  
473 trypanosome defense. *Developmental & Comparative Immunology*, **42**, 240–243.
- 474 Dijkers PF, O’Farrell PH (2007) *Drosophila* Calcineurin Promotes Induction of Innate Immune  
475 Responses. *Current Biology*, **17**, 2087–2093.
- 476 Dinglasan RR, Devenport M, Florens L *et al.* (2009) The *Anopheles gambiae* adult midgut

- 477 peritrophic matrix proteome. *Insect Biochemistry and Molecular Biology*, **39**, 125–134.
- 478 Dong Y, Cirimotich CM, Pike A, Chandra R, Dimopoulos G (2012) Anopheles NF- $\kappa$ B-regulated  
479 splicing factors direct pathogen-specific repertoires of the hypervariable pattern recognition  
480 receptor AgDscam. *Cell Host and Microbe*, **12**, 521–530.
- 481 Dong YM, Taylor HE, Dimopoulos G (2006) AgDscam, a hypervariable immunoglobulin domain-  
482 containing receptor of the *Anopheles gambiae* innate immune system. *Plos Biology*, **4**, 1137–1146.
- 483 Felix R, Silveira H (2012) The Role of *Anopheles gambiae* P450 Cytochrome in Insecticide  
484 Resistance and Infection. In: *Insecticides - Pest Engineering*. InTech.
- 485 Ferdig MT, Taft AS, Smartt CT *et al.* (2000) *Aedes aegypti* dopa decarboxylase: gene structure and  
486 regulation. *Insect molecular biology*, **9**, 231–239.
- 487 Franc NC, Heitzler P, B RA, Ezekowitz, White K (1999) Requirement for Croquemort in  
488 Phagocytosis of Apoptotic Cells in *Drosophila*. *Science*, **284**, 1991–1994.
- 489 Gerardo NM, Altincicek B, Anselme C *et al.* (2010) Immunity and other defenses in pea aphids,  
490 *Acyrtosiphon pisum*. *Genome Biology*, **11**, R21.
- 491 Götz S, García-Gómez JM, Terol J *et al.* (2008) High-throughput functional annotation and data  
492 mining with the Blast2GO suite. *Nucleic Acids Research*, **36**, 3420–3435.
- 493 Gregorio ED, Spellman PT, Rubin GM, Lemaitre B (2001) Genome-wide analysis of the  
494 *Drosophila* immune response by using oligonucleotide microarrays. *Proceedings of the National  
495 Academy of Sciences*, **98**, 12590–12595.
- 496 Gschwend TP, Krueger SR, Kozlov SV, Wolfer DP, Sonderegger P (1997) Neurotrypsin, a Novel  
497 Multidomain Serine Protease Expressed in the Nervous System. *Molecular and Cellular  
498 Neuroscience*, **9**, 207–219.
- 499 Hauton C, Smith VJ (2007) Adaptive immunity in invertebrates: a straw house without a  
500 mechanistic foundation. *Bioessays*, **29**, 1138–1146.
- 501 Isogai Z, Ono RN, Ushiro S *et al.* (2003) Latent transforming growth factor  $\beta$ -binding protein 1  
502 interacts with fibrillin and is a microfibril-associated protein. *Journal of Biological Chemistry*, **278**,

503 2750–2757.

504 Johansen KA, Iwaki DD, Lengyel JA (2003) Localized JAK/STAT signaling is required for  
505 oriented cell rearrangement in a tubular epithelium. *Development*, **130**, 135–145.

506 Karkali K, Panayotou G (2012) The Drosophila DUSP Puckered is phosphorylated by JNK and p38  
507 in response to arsenite-induced oxidative stress. *Biochemical and Biophysical Research  
508 Communications*, **418**, 301–306.

509 Kocks C, Cho JH, Nehme N *et al.* (2005) Eater, a Transmembrane Protein Mediating Phagocytosis  
510 of Bacterial Pathogens in Drosophila. *Cell*, **123**, 335–346.

511 Korner P, Schmid-Hempel P (2004) In vivo dynamics of an immune response in the bumble bee  
512 *Bombus terrestris*. *Journal of Invertebrate Pathology*, **87**, 59–66.

513 Kuraishi T, Binggeli O, Opota O, Buchon N, Lemaitre B (2011) Genetic evidence for a protective  
514 role of the peritrophic matrix against intestinal bacterial infection in *Drosophila melanogaster*.  
515 *Proceedings of the National Academy of Sciences of the United States of America*, **108**, 15966–  
516 15971.

517 Lambrechts L (2010) Dissecting the Genetic Architecture of Host-Pathogen Specificity. *PLOS  
518 Pathogens*, **6**.

519 Lehane MJ (1997) Peritrophic matrix structure and function. *Annual review of entomology*, **42**,  
520 525–550.

521 Lemaitre B, Hoffmann J (2007) The host defense of *Drosophila melanogaster*. *Annual Review of  
522 Immunology*, **25**, 697–743.

523 Lesch C, Goto A, Lindgren M *et al.* (2007) A role for Hemolactin in coagulation and immunity in  
524 *Drosophila melanogaster*. *Developmental and comparative immunology*, **31**, 1255–1263.

525 Ligoxygakis P, Bulet P, Reichhart J-M (2002) Critical evaluation of the role of the Toll-like  
526 receptor 18-Wheeler in the host defense of *Drosophila*. *EMBO reports*, **3**, 666–673.

527 Mallon EB, Loosli R, Schmid-Hempel P (2003) Specific versus nonspecific immune defense in the  
528 bumblebee, *Bombus terrestris* L. *Evolution*, **57**, 1444–1447.



- 529 McCarthy DJ, Chen, Y., Smyth GK (2012) Differential expression analysis of multifactor RNA-Seq  
530 experiments with respect to biological variation. *Nucleic Acids Research*, **40**, 4288–4297.
- 531 Molina-Cruz A, DeJong RJ, Charles B *et al.* (2008) Reactive oxygen species modulate *Anopheles*  
532 *gambiae* immunity against bacteria and *Plasmodium*. *The Journal of biological chemistry*, **283**,  
533 3217–3223.
- 534 Moret Y, Schmid-Hempel P (2009) Immune responses of bumblebee workers as a function of  
535 individual and colony age: senescence versus plastic adjustment of the immune function. *Oikos*,  
536 **118**, 371–378.
- 537 Mukherjee T, Kim WS, Mandal L, Banerjee U (2011) Interaction between Notch and Hif-alpha in  
538 development and survival of *Drosophila* blood cells. *Science (New York, N.Y.)*, **332**, 1210–1213.
- 539 R Core Team (2013) *R: A language and environment for statistical computing*. R foundation for  
540 statistical computing, Vienna, Austria.
- 541 Ragab A, Buechling T, Gesellchen V *et al.* (2011) *Drosophila* Ras/MAPK signalling regulates  
542 innate immune responses in immune and intestinal stem cells. *The EMBO Journal*, **30**, 1123–1136.
- 543 Rämets M, Pearson A, Manfrulli P *et al.* (2001) *Drosophila* scavenger receptor CI is a pattern  
544 recognition receptor for bacteria. *Immunity*, **15**, 1027–1038.
- 545 Riddell C, Adams S, Schmid-Hempel P, Mallon EB (2009) Differential Expression of Immune  
546 Defences Is Associated with Specific Host-Parasite Interactions in Insects. *PLoS ONE*, **4**, e7621.
- 547 Riddell CE, Sumner S, Adams S, Mallon EB (2011) Pathways to immunity: Temporal dynamics of  
548 the bumblebee (*Bombus terrestris*) immune response against a trypanosomal gut parasite. *Insect*  
549 *Molecular Biology*, **20**, 529–540.
- 550 Van Rij RP, Saleh M-C, Berry B *et al.* (2006) The RNA silencing endonuclease Argonaute 2  
551 mediates specific antiviral immunity in *Drosophila melanogaster*. *Genes & development*, **20**, 2985–  
552 2995.
- 553 Scharlaken B, De Graaf DC, Memmi S *et al.* (2007) Differential protein expression in the honey  
554 bee head after a bacterial challenge. *Archives of Insect Biochemistry and Physiology*, **65**, 223–237.

- 555 Schlüns H, Sadd BM, Schmid-Hempel P, Crozier RH (2010) Infection with the trypanosome  
556 *Crithidia bombi* and expression of immune-related genes in the bumblebee *Bombus terrestris*.  
557 *Developmental and comparative immunology*, **34**, 705–709.
- 558 Schmid-Hempel P (2001) On the evolutionary ecology of host-parasite interactions: addressing the  
559 question with regard to bumblebees and their parasites. *Naturwissenschaften*, **88**, 147–158.
- 560 Schmid-Hempel P (2005) Natural insect host-parasite systems show immune priming and  
561 specificity: puzzles to be solved. *Bioessays*, **27**, 1026–1034.
- 562 Schmid-Hempel P, Pühr K, Krüger N, Reber C, Schmid-Hempel R (1999) Dynamic and genetic  
563 consequences of variation in horizontal transmission for a microparasitic infection. *Evolution*, **53**,  
564 426–434.
- 565 Schmid-Hempel P, Reber-Funk C (2004) The distribution of genotypes of the trypanosome parasite,  
566 *Crithidia bombi*, in populations of its host *Bombus terrestris*. *Parasitology*, **129**, 147–158.
- 567 Smith PH, Mwangi JM, Afrane YA *et al.* (2011) Alternative splicing of the *Anopheles gambiae*  
568 *Dscam* gene in diverse *Plasmodium falciparum* infections. *Malaria Journal*, **10**, 156.
- 569 Soscia SJ, Kirby JE, Washicosky KJ *et al.* (2010) The Alzheimer's Disease-Associated Amyloid  $\beta$ -  
570 Protein Is an Antimicrobial Peptide. *PLoS ONE*, **5**, e9505.
- 571 Soukup SF, Culi J, Gubb D (2009) Uptake of the Necrotic Serpin in *Drosophila melanogaster* via  
572 the Lipophorin Receptor-1. *PLoS Genet*, **5**, e1000532.
- 573 Supek F, Bošnjak M, Škunca N, Šmuc T (2011) REVIGO Summarizes and Visualizes Long Lists  
574 of Gene Ontology Terms. *PLoS ONE*, **6**, e21800.
- 575 Tahar R, Boudin C, Thiery I, Bourgouin C (2002) Immune response of *Anopheles gambiae* to the  
576 early sporogonic stages of the human malaria parasite *Plasmodium falciparum*. *The EMBO Journal*,  
577 **21**, 6673–6680.
- 578 Takamatsu H, Kumanogoh A (2012) Diverse roles for semaphorin–plexin signaling in the immune  
579 system. *Trends in Immunology*, **33**, 127–135.
- 580 Vierstraete E, Verleyen P, Baggerman G *et al.* (2004) A proteomic approach for the analysis of

581 instantly released wound and immune proteins in *Drosophila melanogaster* hemolymph.  
582 *Proceedings of the National Academy of Sciences of the United States of America*, **101**, 470–475.

583 Vlachou D, Schlegelmilch T, Christophides GK, Kafatos FC (2005) Functional genomic analysis of  
584 midgut epithelial responses in *Anopheles* during *Plasmodium* invasion. *Current biology: CB*, **15**,  
585 1185–1195.

586 Wähe A, Kasmapour B, Schmaderer C *et al.* (2010) Golgi-to-phagosome transport of acid  
587 sphingomyelinase and prosaposin is mediated by sortilin. *Journal of Cell Science*, **123**, 2502–2511.

588 Watson FL, Püttmann-Holgado R, Thomas F *et al.* (2005) Extensive Diversity of Ig-Superfamily  
589 Proteins in the Immune System of Insects. *Science*, **309**, 1874–1878.

590 Weiss BL, Wang J, Maltz MA, Wu Y, Aksoy S (2013) Trypanosome Infection Establishment in the  
591 Tsetse Fly Gut Is Influenced by Microbiome-Regulated Host Immune Barriers. *PLoS Pathog*, **9**,  
592 e1003318.

593 Wu TD, Nacu S (2010) Fast and SNP-tolerant detection of complex variants and splicing in short  
594 reads. *Bioinformatics (Oxford, England)*, **26**, 873–881.

595 Yagi Y, Ip YT (2005) Helicase89B is a Mot1p/BTAF1 homologue that mediates an antimicrobial  
596 response in *Drosophila*. *EMBO reports*, **6**, 1088–1094.

597 Zhao P, Dong Z, Duan J *et al.* (2012) Genome-Wide Identification and Immune Response Analysis  
598 of Serine Protease Inhibitor Genes in the Silkworm, *Bombyx mori*. *PLoS ONE*, **7**, e31168.

599 Zou Z, Lopez DL, Kanost MR, Evans JD, Jiang H (2006) Comparative analysis of serine protease-  
600 related genes in the honey bee genome: possible involvement in embryonic development and innate  
601 immunity. *Insect Molecular Biology*, **15**, 603–614.

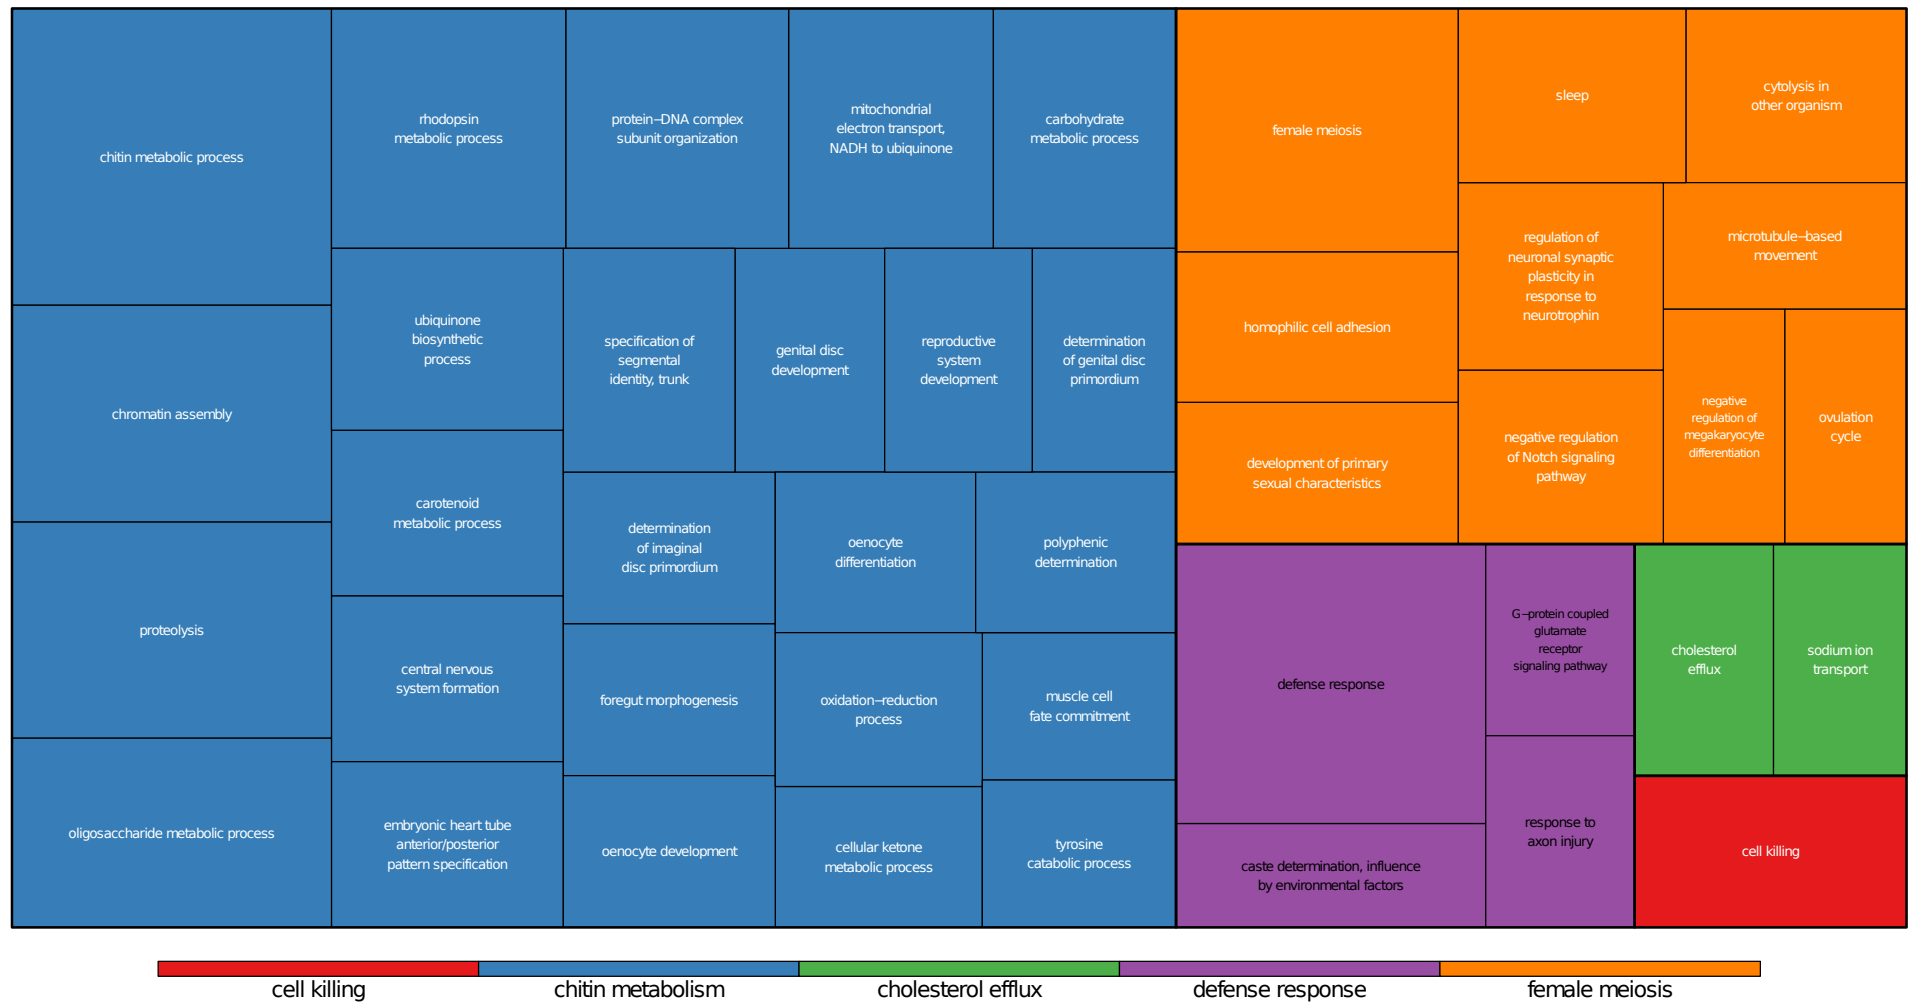

602

Figure 1 A summary of the enriched GO terms (based on Blast2Go annotation) found for differentially expressed genes at 24 hours (infected versus uninfected). This figure was produced using Revigo (*Supek et al. 2011*).

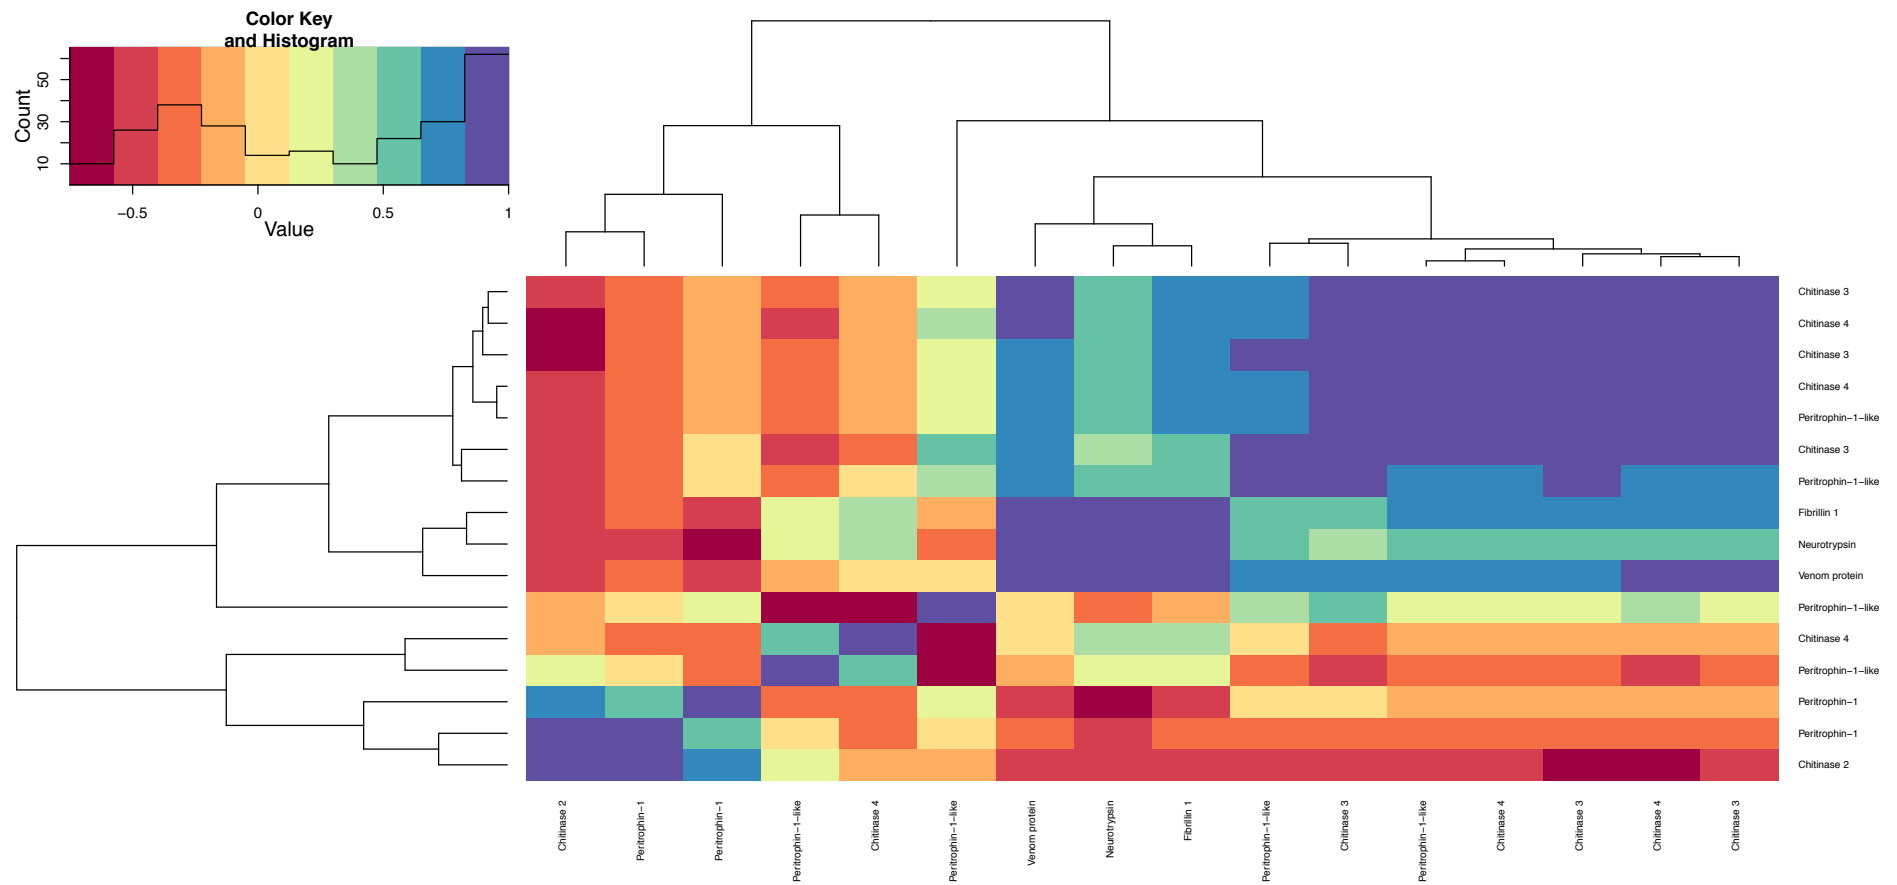

Figure 2. A heatmap showing the correlations of the expression patterns of the transcripts labelled as chitin metabolism genes that were differentially expressed twenty four hours post-infection compared to uninfected samples (infected versus uninfected).

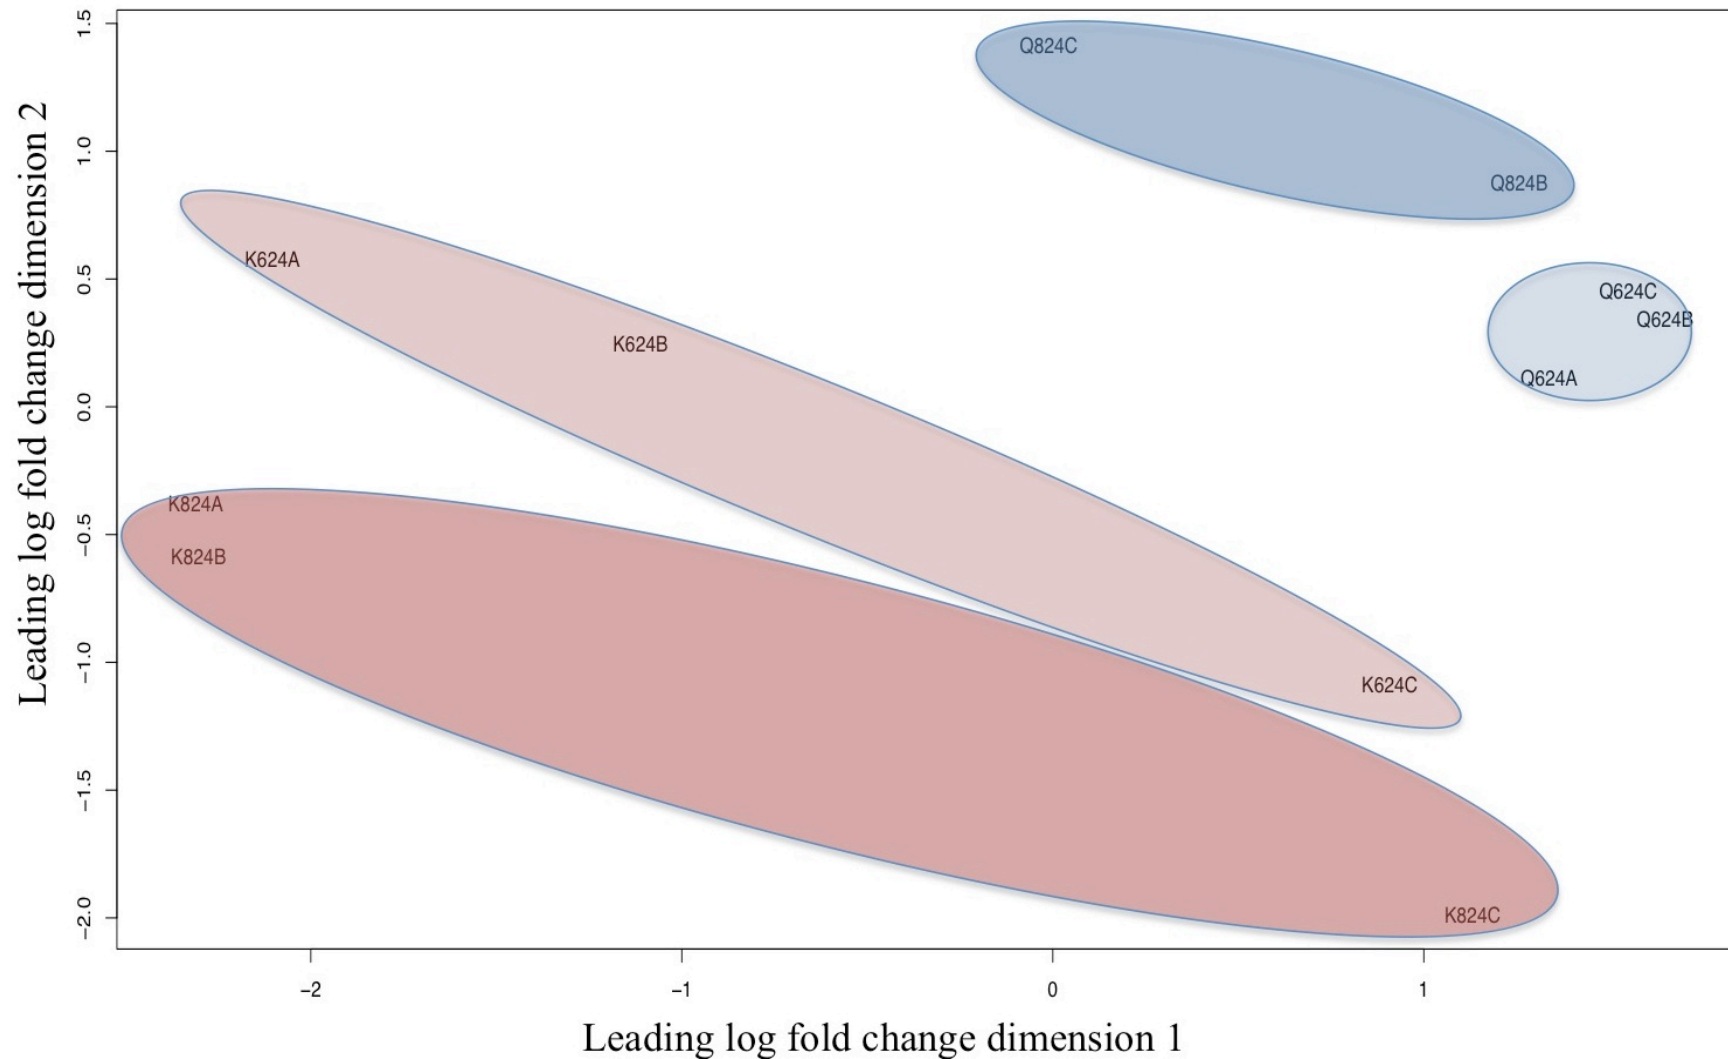

Figure 3. A multidimensional scaling (MDS) plot of the 11 samples used in the specificity analysis based on the expression of 591 differentially expressed transcripts. There are two colonies (K (red) and Q (blue)) and two *Crithidia* strains (6 (light) and 8 (dark)). A/B/C refers to replicates. Dimension 1 is the direction that best separates the samples. Dimension 2 is the next best direction, uncorrelated with the first, that separates the samples. The leading log-fold-change is the average (root-mean-square) of the largest absolute log-fold-changes between each pair of samples. The samples are grouped into their colony-strain interaction.



| Serine Proteases           | Upregulated | Downregulated                                                |
|----------------------------|-------------|--------------------------------------------------------------|
| CLIPA6                     |             | BTT20125_1                                                   |
| CLIPA7                     |             | BTT07313_1, BTT31897_1                                       |
| CLIPD5                     |             | BTT10579_1, BTT10912_1, BTT18247_1<br>BTT25711_1, BTT06803_1 |
| SP24                       | BTT03436_1  |                                                              |
| SP27                       |             | BTT08108_1, BTT38696_1                                       |
| SP35                       | BTT05300_1  |                                                              |
| Serine protease homologues | Upregulated | Downregulated                                                |
| SPH54                      | BTT01977_1  | BTT06125_1                                                   |
| Serine protease inhibitors | Upregulated | Downregulated                                                |
| NEC-like                   |             | BTT31997_1                                                   |
| spn4                       |             | BTT04130_1, BTT40693_1, BTT41025_1,<br>BTT41461_1            |
| SRPN10                     |             | BTT04508_1, BTT20259_1                                       |

*Table 1. List of transcriptions associated with serine proteases and serine protease inhibitors found to be differentially expressed twenty four hours post infection with Crithidia bombi (Infected versus uninfected).*



| Serine Proteases              | Upregulated                                                                        | Downregulated                                  |
|-------------------------------|------------------------------------------------------------------------------------|------------------------------------------------|
| cSp3                          | BTT35293_1                                                                         | BTT10579_1, BTT10912_1, BTT18247_1, BTT25711_1 |
| Sp18                          | BTT20808_1                                                                         |                                                |
| Sp27                          | BTT40251_1                                                                         |                                                |
| Sp28                          |                                                                                    | BTT20637_1                                     |
| Sp35                          | BTT05300_1                                                                         | BTT10155_1                                     |
| Sp40                          | BTT15256_1                                                                         |                                                |
| Tequilla/GRAL/Sp23            | BTT01709_1, BTT05886_1, BTT09081_1, BTT20661_1, BTT20725_1, BTT24359_1, BTT25071_1 |                                                |
| Serine protease homologues    | Upregulated                                                                        | Downregulated                                  |
| cSPH39                        |                                                                                    | BTT21868_1                                     |
| Sph54                         |                                                                                    | BTT27769_1                                     |
| Sph56                         | BTT17814_1                                                                         |                                                |
| Serine protease inhibitors    | Upregulated                                                                        | Downregulated                                  |
| Kunitz ser-protease inhibitor |                                                                                    | BTT14993_1                                     |
| necrotic (nec)                | BTT35742_1                                                                         |                                                |
| Spn 4                         |                                                                                    | BTT04130_1                                     |
| SRPN10                        |                                                                                    | BTT02607_1, BTT4508_1, BTT20259_1, BTT40693_1  |

Table 2. List of transcriptions associated with serine proteases and serine protease inhibitors found to be differentially expressed in the specificity analysis.
